# Supplementary material for: Low-Cost Arduino Reverse Transcriptase Loop-Mediated Isothermal Amplification (RT-LAMP) for Sensitive Nucleic Acid Detection
Source: MDPI journal article supplement (doi:10.3390/bios14030128), 2024-02-29
Supplement: s1 [file s1]

# Low-Cost Arduino Reverse Transcriptase Loop-Mediated Isothermal Amplification (RT-LAMP) for Sensitive Nucleic Acid Detection

Bruno Dias Camargo <sup>1,2</sup>, Mateus Cassaboni Stracke <sup>1,2</sup>, Heloisa Bruna Soligo Sanchuki <sup>1</sup>, Viviane Klassen de Oliveira <sup>2</sup>, Hellen Cristina Ancelmo <sup>1,2</sup>, Dayanne Mozaner Bordin <sup>3,\*</sup>, Fabricio Klerynton Marchini <sup>1,2</sup>, Emilson Ribeiro Viana <sup>4</sup> and Lucas Blanes <sup>1,2</sup>

- <sup>1</sup> Laboratory for Applied Science and Technology in Health, Carlos Chagas Institute, Oswaldo Cruz Foundation (Fiocruz), Professor Algacyr Munhoz Mader 3775 St., Curitiba 81350-010, Brazil; bruno.camargo@ibmp.org.br (B.D.C.); mateus.stracke@ibmp.org.br (M.C.S.); heloisa.sanchuki@ibmp.org.br (H.B.S.S.); hellen.ancelmo@ibmp.org.br (H.C.A.); fabricio.marchini@ibmp.org.br (F.K.M.); lucas.blanes@fiocruz.br (L.B.)
- <sup>2</sup> Paraná Institute of Molecular Biology, Professor Algacyr Munhoz Mader 3775 St., Curitiba 81350-010, Brazil; klassen.viviane@gmail.com
- <sup>3</sup> School of Mathematical and Physical Sciences, Faculty of Science, University of Technology Sydney, Ultimo, NSW 2007, Australia
- <sup>4</sup> Academic Department of Physics (DAFIS), Federal University of Technology – Paraná (UTFPR), Sete de Setembro 3165 Av., Curitiba 80230-901, Brazil; emilsonjunior@utfpr.edu.br
- \* Correspondence: dayanne.bordin@uts.edu.au

**Supplementary Table S1.** Set of RT-LAMP primers originally designed by Rabe and Cepko (2020) to detect SARS-CoV-2 by RT-LAMP and presently used by our research group.

| Primers    | Sequence (5' - 3')                                  |
|------------|-----------------------------------------------------|
| <b>F3</b>  | CGGTGGACAAATTGTCAC                                  |
| <b>B3</b>  | CTTCTCTGGATTTAACACACTT                              |
| <b>LF</b>  | TTACAAGCTTAAAGAATGTCTGAACACT                        |
| <b>LB</b>  | TTGAATTTAGGTGAAACATTTGTCACG                         |
| <b>FIP</b> | TCAGCACACAAAGCCAAAAATTTATTTTTCTGTGCAAAGGAAATTAAGGAG |
| <b>BIP</b> | TATTGGTGGAGCTAAACTTAAAGCCTTTTCTGTACAATCCCTTTGAGTG   |
